# Supplementary material
Source: MDPI journal article supplement (https://www.mdpi.com/2075-163X/12/2/271)
Supplement: s1 [file s1]

Archive with 1 entries (1 files):
- minerals-1536461-supplementary.pdf
