# Supplementary material
Source: MDPI journal article supplement (https://www.mdpi.com/2075-163X/12/2/271)
Supplement: s1 [file s1 › minerals-1536461-supplementary.pdf]

## Supporting Materials

# Stability Evaluation of Layered Backfill Considering Filling Interval, Backfill Strength and Creep Behavior

Chongchong Qi<sup>1,2\*</sup>, Li Guo<sup>1</sup>, Yan Feng<sup>1</sup>, Qinli Zhang<sup>1</sup> and Qiusong Chen<sup>1\*</sup>

<sup>1</sup> School of Resources and Safety Engineering, Central South University, Changsha 410083, China

<sup>2</sup> State Key Laboratory for GeoMechanics and Deep Underground Engineering, China University of Mining & Technology, Xuzhou 221116, China

\* Correspondence: Chongchong Qi (chongchong.qi@csu.edu.cn); Qiusong Chen (qiusong.chen@csu.edu.cn)

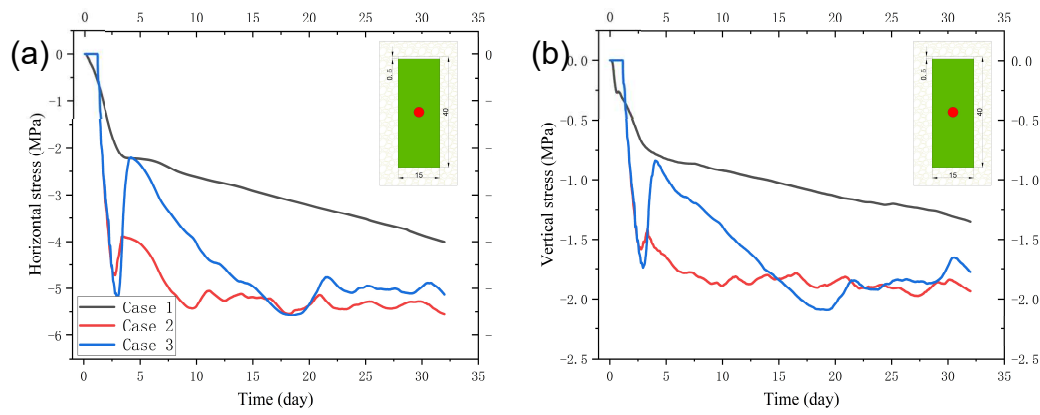

**Figure S1.** The influence of backfill layers on the (a) horizontal stress and (b) vertical stress on the central stope (see the red dot in S1).

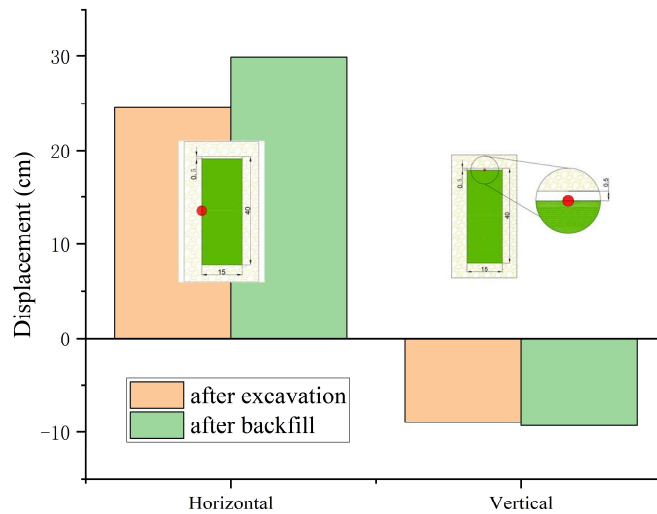

**Figure S2.** Difference of horizontal and vertical displacement after the excavation and backfill in MC.

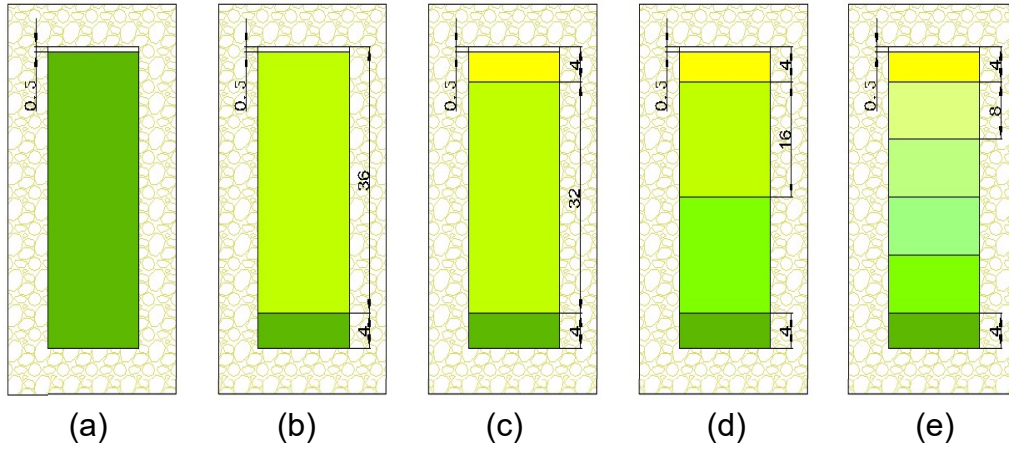

**Figure S3.** Different layers of cement paste backfill case: **(a)** backfill in a single step; **(b)** backfill in two steps; **(c)** backfill in three steps **(d)** backfill in four steps and **(e)** backfill in six steps.

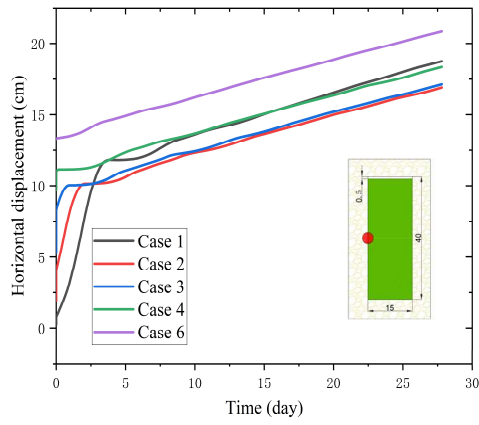

**(a)**

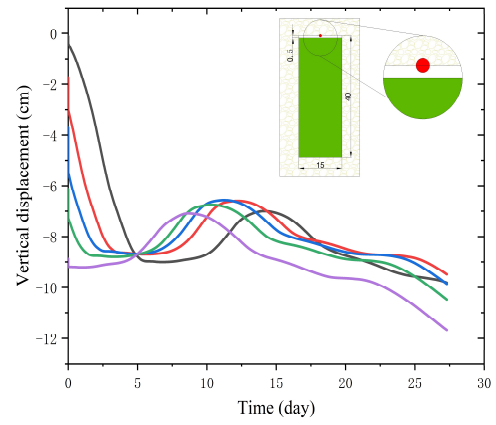

**(b)**

**Figure S4.** The influence of different backfill layers (see the S2) on the **(a)** horizontal displacement and **(b)** vertical displacement on the monitor point (see the red dot in S3). Note that time started from when the backfilling was finished and excluded the FIT.
